# Supplementary material
Source: MDPI journal article supplement (https://www.mdpi.com/2306-5729/8/11/167)

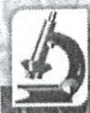

Russian Collection of Agricultural Microorganisms

МИНИСТЕРСТВО НАУКИ И ВЫСШЕГО ОБРАЗОВАНИЯ  
РОССИЙСКОЙ ФЕДЕРАЦИИ

Федеральное государственное бюджетное научное учреждение  
«Всероссийский научно-исследовательский институт  
сельскохозяйственной микробиологии»  
(ФГБНУ ВНИИСХМ)

196608 Санкт-Петербург, Пушкин,  
шоссе Подбельского, 3  
Телефон 8-812-470-51-00  
Факс 470-43-62

Выдано в лабораторию №7 ФГБНУ  
ВНИИСХМ

31.10.2023 № 240/10

СПРАВКА

о депонировании культуры микроорганизмов в Сетевой биоресурсной  
коллекции в области генетических технологий для сельского хозяйства  
(RCAM)

1. **Депозиторы:** Федеральное государственное бюджетное научное учреждение  
«Всероссийский научно-исследовательский институт сельскохозяйственной микробиологии»  
(ФГБНУ ВНИИСХМ), 196608 г. СПб, г. Пушкин ш. Подбельского, д.3.

2. **Авторы:** Кандыбин Н.В., Ермолова Е.П., Кубасова В.В.

3. **Штамм *Bacillus sphaericus* 1795** обладает высокой токсичностью для личинок II возраста комаров родов *Gulex* и *Aedes*, демонстрируя активность в отношении видов *Aedes caspis*, *Aedes communis*, *Aedes dorsalis*, *Aedes dorsalis*, *Aedes flavescens*, *Aedes leucomelas*, *Culex pipiens molestus* и безопасный для гидробионтов, таких как плоские черви (*Planaria torva*), головоногие (*Limnaea palustris*, *Limnaea stagnalis*), ракообразные (*Asellus aquaticus*, *Cyclops strenuus*, *Cypridopsis sp.*, *Cypris sp.*, *Daphnia magna*, *Daphnia pulex*), коллемболы (*Podura aquatica*), насекомые (*Cloeon dipterum*, *Cloeon inscriptum*, *Lestes nympha*, *Lestes sponsa*, *Lestes virens*, *Nemoura cinerea*, *Sympetrum danae*, *Sympetrum flaveolum*). Депонирован как практически-ценный для целей патентной процедуры.

4. **Штамм *Bacillus sphaericus* 1795** депонирован 10 сентября 2014 г. под регистрационным номером **RCAM02787**.

5. **Адрес коллекции:** 196608, Санкт-Петербург, Пушкин, шоссе Подбельского, д. 3, ФГБНУ ВНИИСХМ; тел. (812)470-51-00, факс(812)470-43-62, e-mail: v.safronova@rambler.ru, сайт: <http://www.arriam.ru>

Директор ФГБНУ ВНИИСХМ, д.б.н.

 В.Е.Цыганов

Заведующая RCAM, к.б.н.

В.И.Сафронова



Supplement: s1 [file s1]
